# Supplementary material for: Improving inappropriate medication and information transfer at hospital discharge: study protocol for a cluster RCT
Source: PubMed Central journal article supplement (PMC6309068; doi:10.1186/s13012-018-0839-1), 2018-12-27
Supplement: 13012_2018_839_MOESM1_ESM.pdf [file 13012_2018_839_MOESM1_ESM.pdf]

No Elements of process and impact evaluation and corresponding items for evaluation

|                                         | Target group |     |     |      |      |     |     | Study stage |     |     |     |     |     |     |     |     |      |     |     |     |     |   |
|-----------------------------------------|--------------|-----|-----|------|------|-----|-----|-------------|-----|-----|-----|-----|-----|-----|-----|-----|------|-----|-----|-----|-----|---|
|                                         | SC           | SSt | HoD | sHPs | jHPs | GPs | Pat | PE1         | PE2 | PE3 | PE4 | PE5 | PE6 | PE7 | PE8 | PE9 | PE10 | OCs | IE1 | IE2 | IE3 |   |
| <b>PROCESS EVALUATION</b>               |              |     |     |      |      |     |     |             |     |     |     |     |     |     |     |     |      |     |     |     |     |   |
| <b>Recruitment of institution</b>       |              |     |     |      |      |     |     |             |     |     |     |     |     |     |     |     |      |     |     |     |     |   |
| 1                                       | X            | X   |     |      |      |     |     | X           | X   |     |     |     |     |     |     |     |      |     |     |     |     |   |
| 2                                       |              |     | X   |      |      |     |     |             | X   |     |     |     |     |     |     |     |      |     |     |     |     |   |
| 3                                       |              |     | X   |      |      |     |     |             | X   |     |     |     |     |     |     |     |      |     |     |     |     |   |
| 4                                       |              |     | X   |      |      |     |     |             | X   |     |     |     |     |     |     |     |      |     |     |     |     |   |
| 5                                       |              |     | X   |      |      |     |     |             | X   |     |     |     |     |     |     |     |      |     |     |     |     |   |
| 6                                       |              |     | X   | X    |      |     |     |             | X   | X   |     |     |     |     |     |     |      |     |     |     |     |   |
| <b>Recruitment of cluster</b>           |              |     |     |      |      |     |     |             |     |     |     |     |     |     |     |     |      |     |     |     |     |   |
| 7                                       | X            | X   |     |      |      |     |     | X           | X   |     |     |     |     |     |     |     |      |     |     |     |     |   |
| 8                                       |              |     |     | X    |      |     |     |             |     |     |     | X   |     |     |     |     |      |     |     |     |     |   |
| 9                                       |              |     |     | X    |      |     |     |             |     |     |     | X   |     |     | X   |     |      |     |     |     |     |   |
| 10                                      |              |     |     | X    |      |     |     |             |     |     |     | X   |     |     |     |     |      |     |     |     |     |   |
| <b>Delivery to cluster</b>              |              |     |     |      |      |     |     |             |     |     |     |     |     |     |     |     |      |     |     |     |     |   |
| 11                                      | X            | X   |     |      |      |     |     | X           | X   |     |     |     |     |     |     |     |      |     |     |     |     |   |
| 12                                      | X            |     |     |      |      |     |     | X           |     |     |     |     |     |     |     |     |      |     |     |     |     |   |
| <b>Response of cluster</b>              |              |     |     |      |      |     |     |             |     |     |     |     |     |     |     |     |      |     |     |     |     |   |
| 13                                      | X            |     |     |      |      |     |     | X           |     |     |     |     |     |     |     |     |      |     |     |     |     |   |
| 14                                      | X            |     |     |      |      |     |     | X           |     |     |     |     |     |     |     |     |      |     |     |     |     |   |
| 15                                      |              |     |     | X    |      |     |     |             |     |     |     | X   |     |     |     |     |      |     |     |     |     |   |
| 16                                      |              |     |     | X    |      |     |     |             |     |     |     |     |     |     | X   |     |      |     |     |     |     |   |
| 17                                      |              |     |     | X    |      |     |     |             |     |     |     |     |     |     | X   |     |      |     |     |     |     |   |
| 18                                      |              |     |     | X    |      |     |     |             |     |     |     |     |     |     | X   |     |      |     |     |     |     |   |
| <b>Recruitment of providers</b>         |              |     |     |      |      |     |     |             |     |     |     |     |     |     |     |     |      |     |     |     |     |   |
| 19                                      |              |     |     |      | X    |     |     |             |     |     |     |     | X   |     |     |     | X    |     |     |     |     |   |
| 20                                      |              |     |     |      |      | X   |     |             |     |     |     |     |     |     |     |     |      | X   |     |     |     |   |
| 21                                      |              |     |     |      |      | X   |     |             |     |     |     |     |     |     |     |     |      | X   |     |     |     |   |
| <b>Delivery to providers</b>            |              |     |     |      |      |     |     |             |     |     |     |     |     |     |     |     |      |     |     |     |     |   |
| 22                                      |              |     |     | X    |      |     |     |             |     |     |     |     |     |     | X   |     |      |     |     |     |     |   |
| 23                                      |              |     |     | X    |      |     |     |             |     |     |     |     | X   | X   |     |     |      |     |     |     |     |   |
| <b>Response of provider</b>             |              |     |     |      |      |     |     |             |     |     |     |     |     |     |     |     |      |     |     |     |     |   |
| 24                                      | X            |     |     |      |      |     |     | X           |     |     |     |     |     |     |     |     |      |     |     |     |     |   |
| 25                                      |              |     |     |      | X    |     |     |             |     |     |     |     |     |     |     |     |      | X   |     |     |     |   |
| 26                                      |              |     |     |      | X    |     |     |             |     |     |     |     |     |     |     |     |      | X   |     |     |     |   |
| 27                                      |              |     |     |      | X    | X   |     |             |     |     |     |     |     |     | X   | X   |      |     |     |     |     |   |
| 28                                      |              |     |     |      | X    |     |     |             |     |     |     |     |     |     |     |     |      | X   |     |     |     |   |
| 29                                      |              |     |     |      | X    |     |     |             |     |     |     |     |     |     |     |     |      | X   |     |     |     |   |
| 30                                      |              |     |     |      | X    |     |     |             |     |     |     |     |     |     |     |     |      | X   |     |     |     |   |
| 31                                      |              |     |     |      | X    |     |     |             |     |     |     |     |     |     |     |     |      | X   |     |     |     |   |
| 32                                      |              |     |     |      | X    |     |     |             |     |     |     |     |     |     |     |     |      | X   |     |     |     |   |
| <b>Recruitment of patients</b>          |              |     |     |      |      |     |     |             |     |     |     |     |     |     |     |     |      |     |     |     |     |   |
| 33                                      |              |     | (X) | X    | X    |     |     |             |     |     |     |     |     | X   |     |     |      |     |     |     |     |   |
| 34                                      |              |     |     |      |      | X   |     |             |     |     |     |     |     | X   |     |     |      |     |     |     |     |   |
| <b>Delivery to patients</b>             |              |     |     |      |      |     |     |             |     |     |     |     |     |     |     |     |      |     |     |     |     |   |
| 35                                      |              |     |     | X    |      |     |     |             |     |     |     |     | X   | X   |     |     |      |     |     |     |     |   |
| <b>Response of patients</b>             |              |     |     |      |      |     |     |             |     |     |     |     |     |     |     |     |      |     |     |     |     |   |
| 36                                      |              |     |     |      |      | X   |     |             |     |     |     |     |     |     | X   | X   |      |     |     |     |     |   |
| <b>IMPACT EVALUATION</b>                |              |     |     |      |      |     |     |             |     |     |     |     |     |     |     |     |      |     |     |     |     |   |
| <b>Maintenance (during cluster RCT)</b> |              |     |     |      |      |     |     |             |     |     |     |     |     |     |     |     |      |     |     |     |     |   |
| 37                                      |              |     |     |      |      |     |     |             |     |     |     |     |     |     |     |     |      |     |     |     |     |   |
| <b>Effectiveness</b>                    |              |     |     |      |      |     |     |             |     |     |     |     |     |     |     |     |      |     |     |     |     |   |
| 38                                      |              |     |     |      |      |     | X   |             |     |     |     |     |     |     |     |     |      |     | X   |     |     |   |
| <b>Unintended consequences</b>          |              |     |     |      |      |     |     |             |     |     |     |     |     |     |     |     |      |     |     |     |     |   |
| 39                                      | X            | X   | X   | X    | X    | X   | X   | X           |     |     |     |     |     |     |     |     |      |     |     |     |     |   |
| <b>Long-term maintenance</b>            |              |     |     |      |      |     |     |             |     |     |     |     |     |     |     |     |      |     |     |     |     |   |
| 40                                      |              | X   |     |      |      |     |     |             |     |     |     |     |     |     |     |     |      |     |     |     | X   |   |
| 41                                      |              | X   |     |      |      |     |     |             |     |     |     |     |     |     |     |     |      |     |     |     | X   |   |
| 42                                      |              | X   |     |      |      |     |     |             |     |     |     |     |     |     |     |     |      |     |     |     | X   |   |
| 43                                      |              |     | X   |      |      |     |     |             |     |     |     |     |     |     |     |     |      |     |     |     |     | X |
| 44                                      |              |     | X   |      |      |     |     |             |     |     |     |     |     |     |     |     |      |     |     |     |     | X |
| 45                                      |              |     | X   |      |      |     |     |             |     |     |     |     |     |     |     |     |      |     |     |     |     | X |
| 46                                      |              |     | X   |      |      |     |     |             |     |     |     |     |     |     |     |     |      |     |     |     |     | X |
| 47                                      |              |     |     |      |      | X   |     |             |     |     |     |     |     |     |     |     |      |     |     |     |     | X |
| 48                                      |              |     |     |      |      | X   |     |             |     |     |     |     |     |     |     |     |      |     |     |     |     | X |
| 49                                      |              |     |     |      |      | X   |     |             |     |     |     |     |     |     |     |     |      |     |     |     |     | X |

Legend: SC: Study center; SSt: Study staff; HoD: Hospital directors; sHPs: Senior hospital physicians; jHPs: Junior hospital physicians; GPs: General practitioners; Pat: Patients; PE: Process evaluation; OCs: Outcome measures; IE: Impact evaluation
