# Supplementary material for: Improving inappropriate medication and information transfer at hospital discharge: study protocol for a cluster RCT
Source: PubMed Central journal article supplement (PMC6309068; doi:10.1186/s13012-018-0839-1), 2018-12-27
Supplement: 13012_2018_839_MOESM2_ESM.pdf [file 13012_2018_839_MOESM2_ESM.pdf]

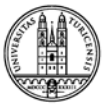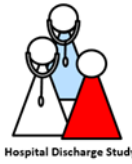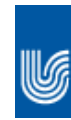

## Feasibility and acceptance

Cluster-ID: .....

Dear colleague

We would like to ask for your assessment of the feasibility and acceptance of the investigated discharge model. Please answer the following questions:

- The discharge checklist is well suited for daily work.  
                                                                                          
 1= strongly disagree    2                      3                      4                      5 = fully agree
  
- The discharge checklist is helpful for optimising the medication.  
                                                                                          
 1= strongly disagree    2                      3                      4                      5 = fully agree
  
- I will continue to use the discharge checklist after the end of the study.  
                                                                                          
 1= strongly disagree    2                      3                      4                      5 = fully agree
  
- I would recommend the discharge checklist to my colleagues.  
                                                                                          
 1= strongly disagree    2                      3                      4                      5 = fully agree
  
- My patients reacted positively to the discharge procedure.  
                                                                                          
 1= strongly disagree    2                      3                      4                      5 = fully agree

Thank you very much for your highly valued cooperation!

---

Please send the completed form **along with the originals of all inclusion lists** to the study centre.  
 Thank you!

---
